# Supplementary material for: Preparation of hydroxyapatite and its elimination of excess fluoride from aqueous solution
Source: Royal Society of Chemistry journal article supplement (doi:10.1039/d4ra02147a), 2024-01-01
Supplement: d4ra02147a1.pdf [file d4ra02147a1.pdf]

## **Preparation of hydroxyapatite and its elimination of excess fluoride from aqueous solution**

Yiming Zou<sup>a,b,c,d</sup>, Yaoting Wang<sup>a,b,c,d</sup>, Junfu Wang<sup>a,b,c,d</sup>, Song Wang<sup>a,b,c,d</sup>, Li Chen<sup>a,b,c,d</sup>,  
Yu Xi<sup>a,b,c,d</sup>, Ruliang Xie<sup>a,b,c,d,\*</sup>, Jie Yang<sup>b,c,\*</sup>, Xin Xiao<sup>c,d,\*</sup>

a. Jiangsu Key Laboratory of Marine Bioresources and Environment, Jiangsu Ocean University, Lianyungang 222005, China.

b. School of Ocean Food and Biological Engineering, Jiangsu Ocean University, Lianyungang 222005, China.

c. Jiangsu Institute of Marine Resources Development, Lianyungang 222005, China.

d. Jiangsu Key Laboratory of Function Control Technology for Advanced Materials, Jiangsu Ocean University, Lianyungang 222005, China.

\* Corresponding author.

E-mail: xieruliang2007@163.com; xiaoxin@njust.edu.cn

---

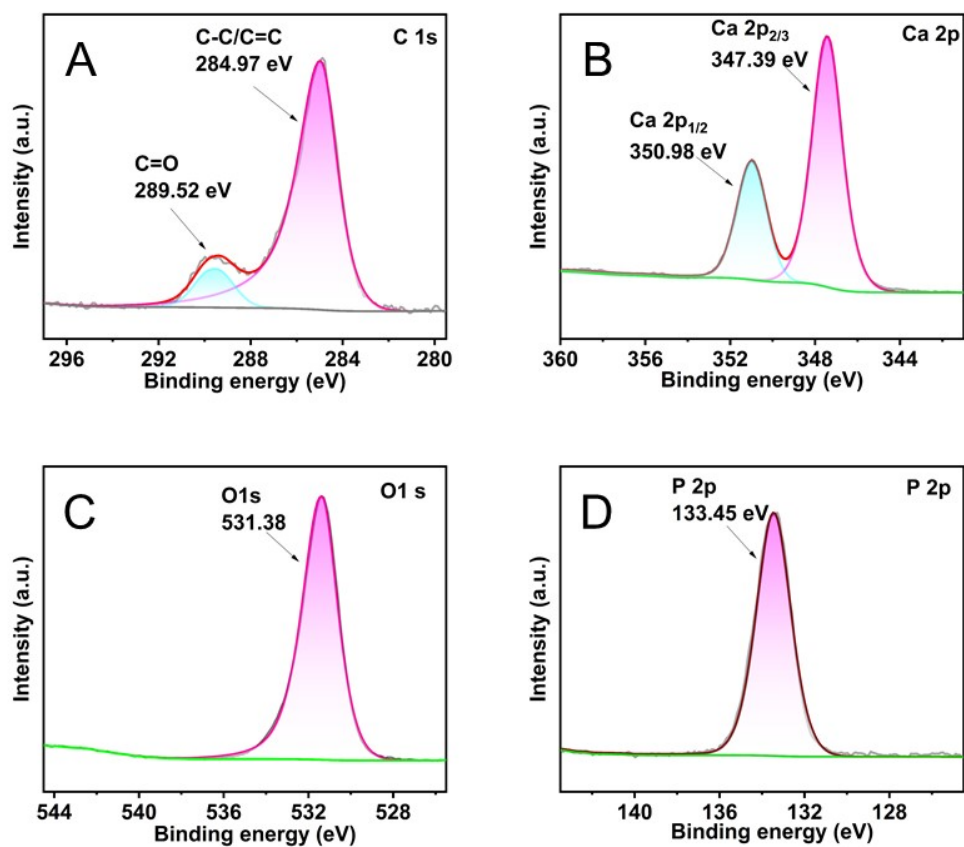

**Fig. S1** XPS spectra of the Xq-HAP. (A) C 1s, (B) Ca 2p, (C) O 1s, and (C) P 2P

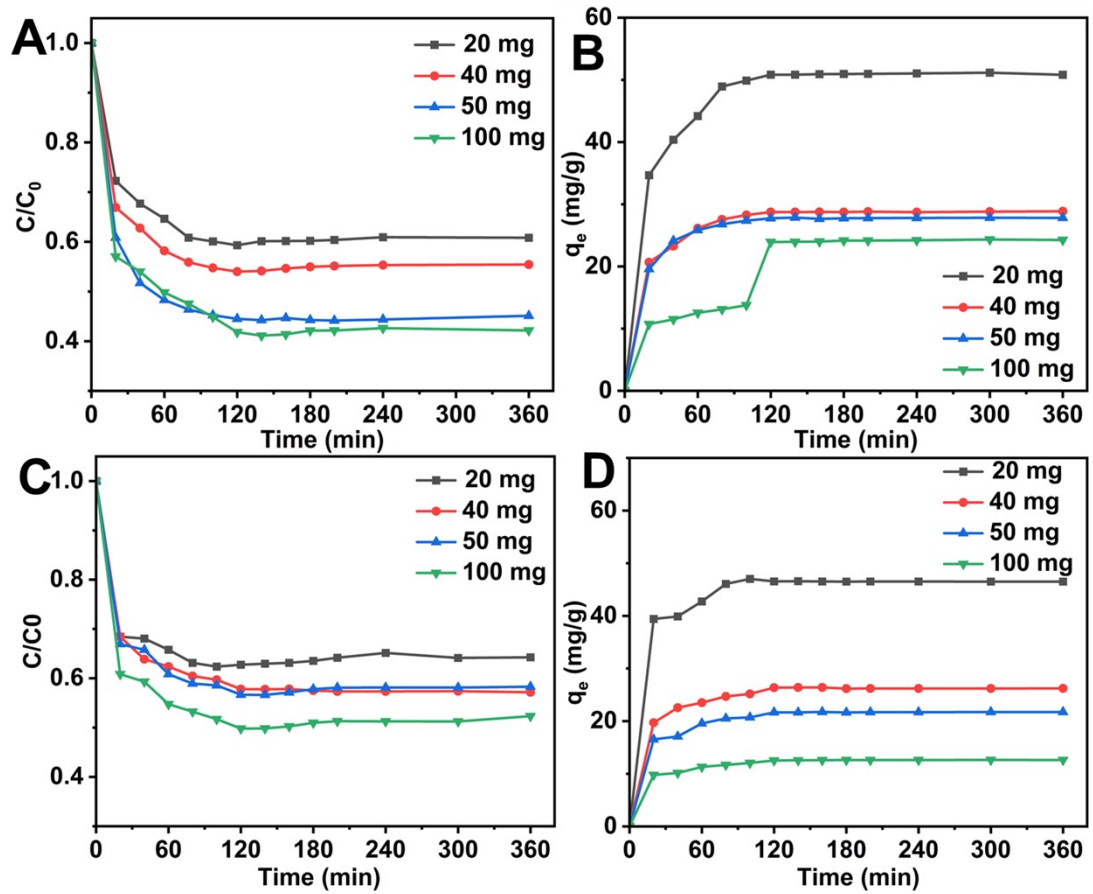

**Fig. S2** Fluoride removal rate and adsorption capacity of Xq-HAP (A, B) and Yt-HAP (C, D) as a function of contact time.

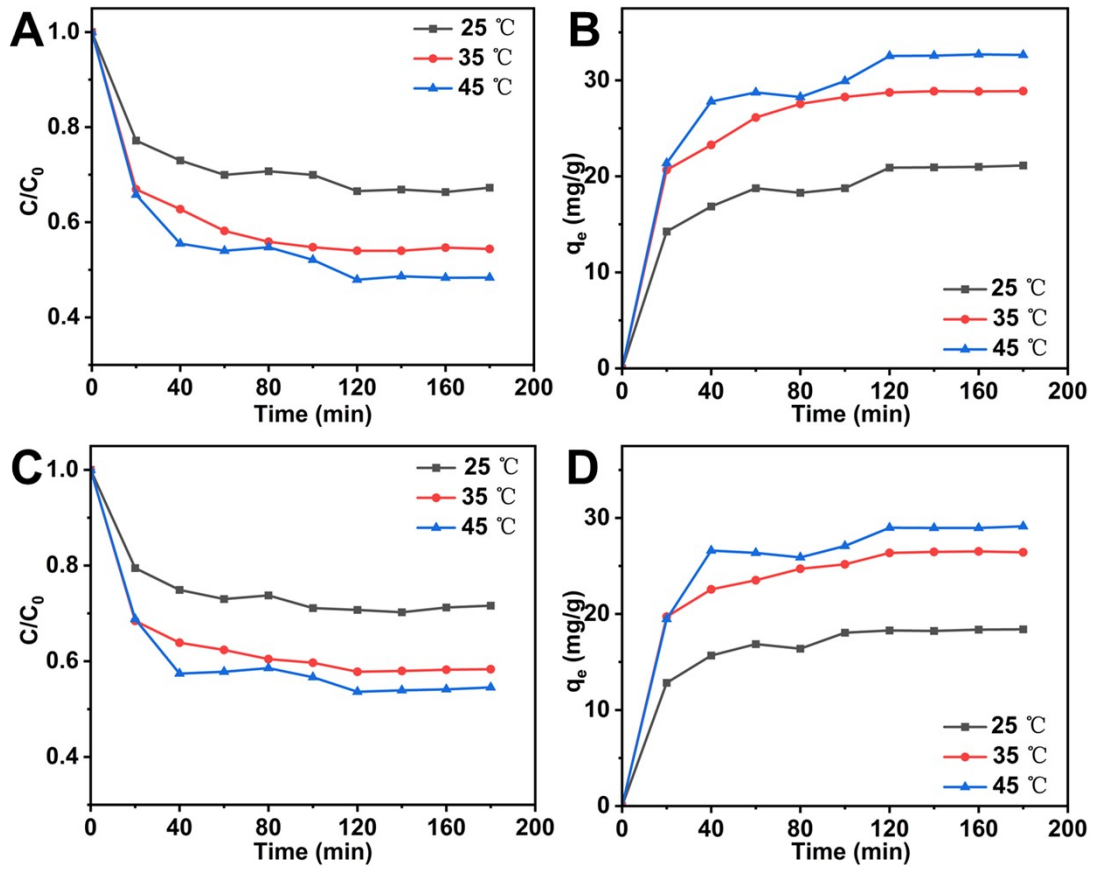

**Fig. S3** Fluoride removal rate and adsorption capacity of Xq-HAP (A, B) and Yt-HAP (C, D) as a function of temperature.
